# Supplementary material
Source: PubMed Central journal article supplement (PMC6165673)
Supplement: NIHMS1501257-supplement-1.pdf [file NIHMS1501257-supplement-1.pdf]

**FIGURE S1**

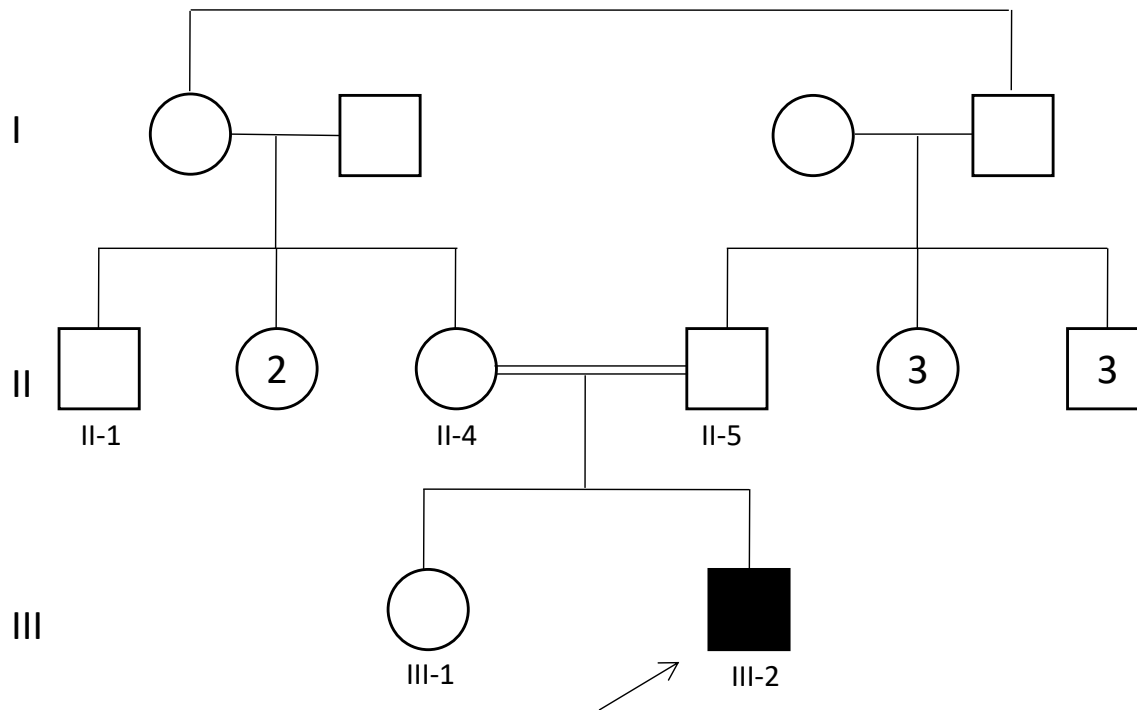

Detailed pedigree structure of TA11.

**FIGURE S2**

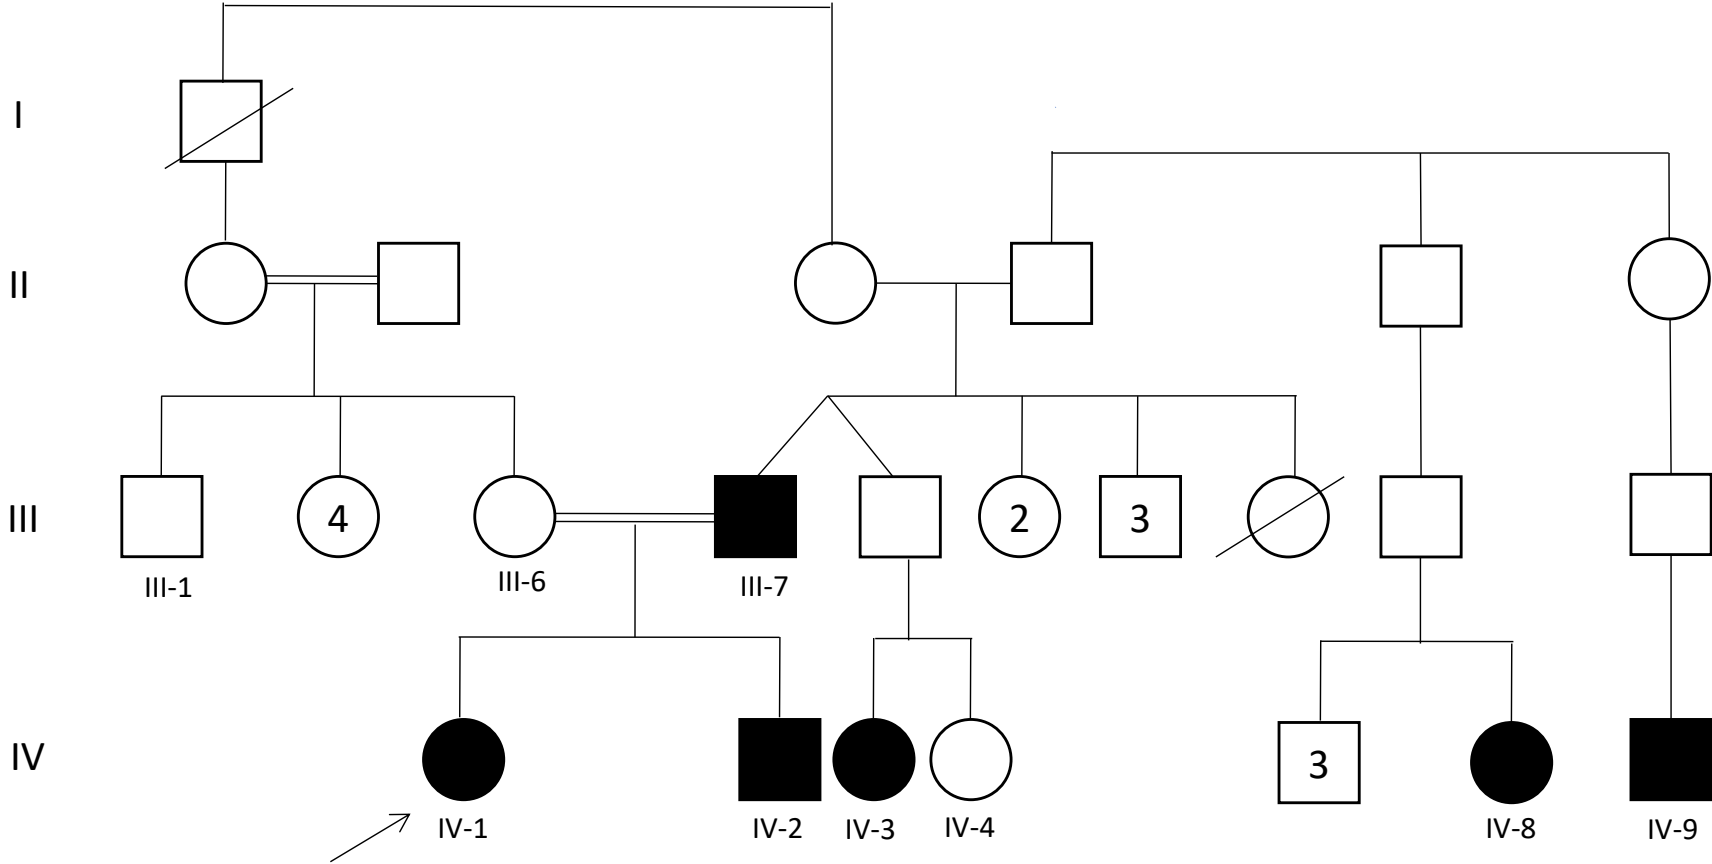

Detailed pedigree structure of TA12.

**FIGURE S3**

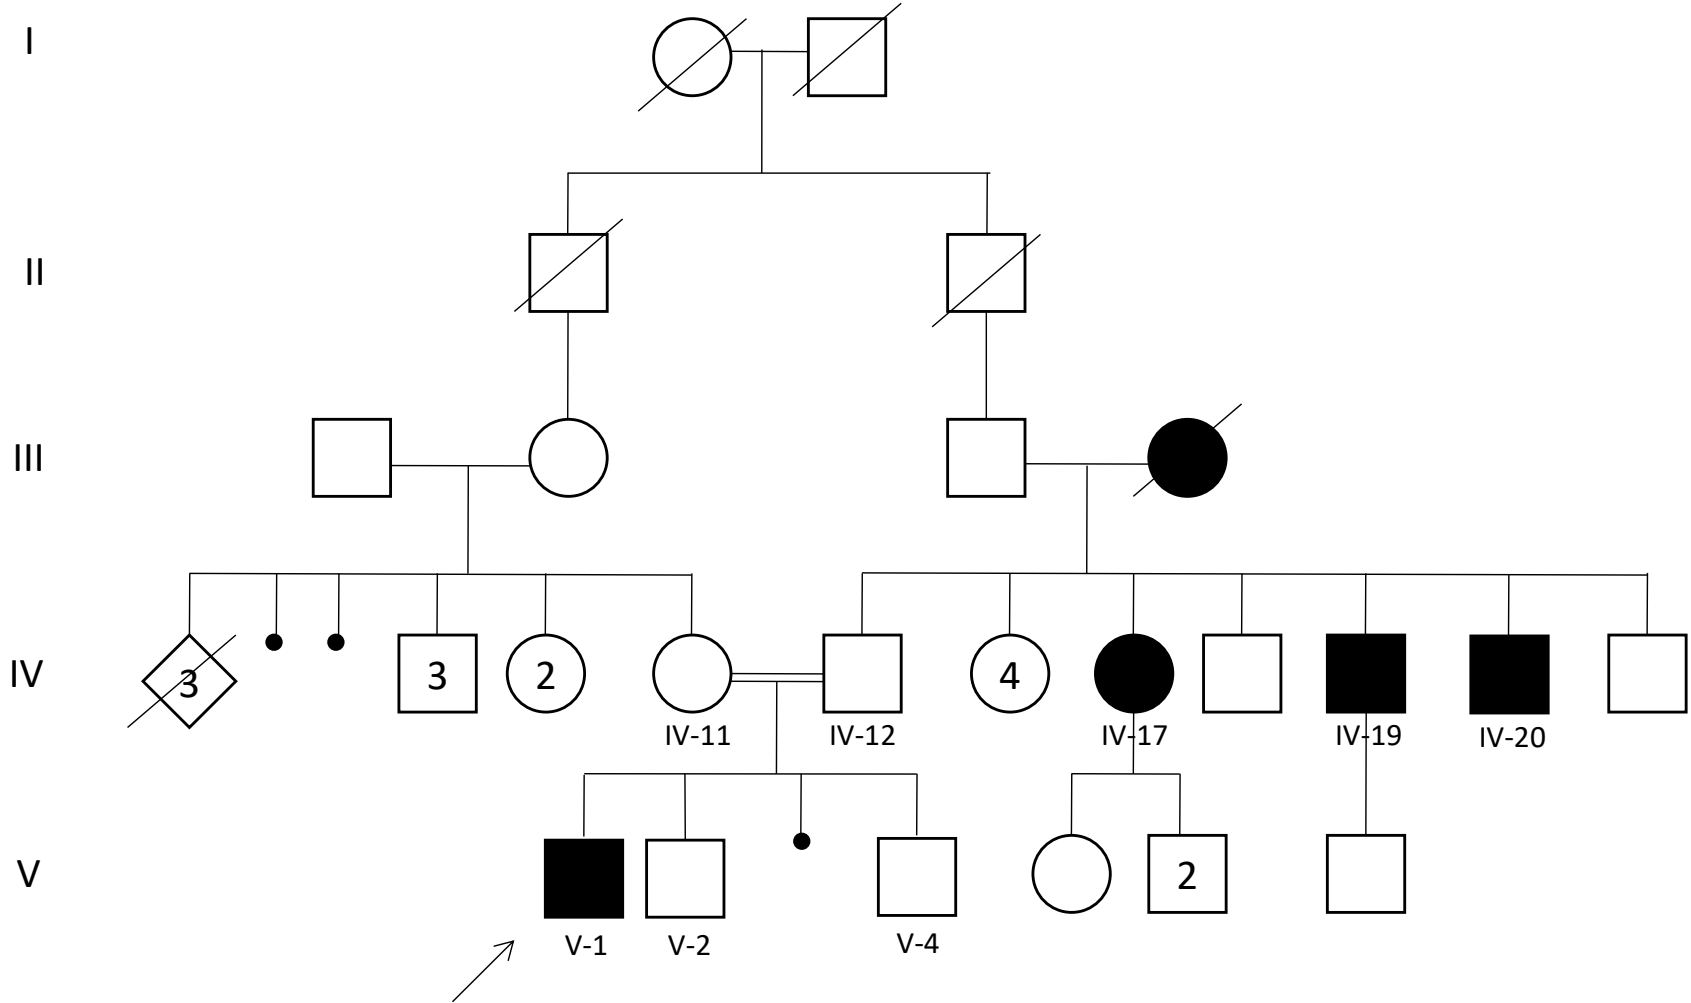

Detailed pedigree structure of TA13.

**FIGURE S4**

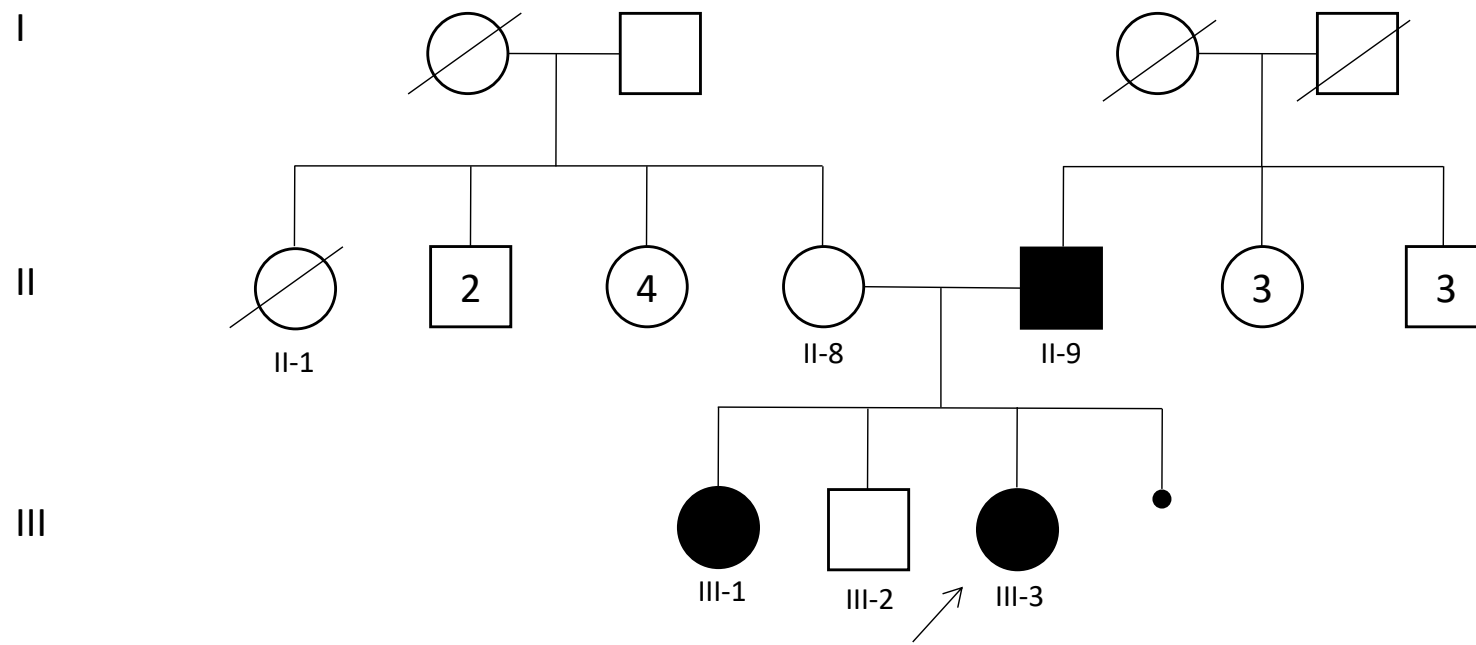

Detailed pedigree structure of TA14.
